# Supplementary material
Source: publisher figshare collection journal article supplement (https://sage.figshare.com/ndownloader/files/14147723)
Supplement: Supplementary file 1 [file 14147723]

Online Supplement: Appendix A  
Items

|                                                                                                                                                                                                                                                                                                                                                                                                                                                                                                                                                                                                                                                                                                                                                                                                                                                                                                                                                                                                                                                                                                                                                                                                                                             |
|---------------------------------------------------------------------------------------------------------------------------------------------------------------------------------------------------------------------------------------------------------------------------------------------------------------------------------------------------------------------------------------------------------------------------------------------------------------------------------------------------------------------------------------------------------------------------------------------------------------------------------------------------------------------------------------------------------------------------------------------------------------------------------------------------------------------------------------------------------------------------------------------------------------------------------------------------------------------------------------------------------------------------------------------------------------------------------------------------------------------------------------------------------------------------------------------------------------------------------------------|
| <p><i>HPWS</i></p> <ul style="list-style-type: none"> <li>■ Training           <ul style="list-style-type: none"> <li>The following topics are regularly communicated and trained in our store:               <ul style="list-style-type: none"> <li>- Customer orientation</li> <li>- Products and product portfolio</li> </ul> </li> </ul> </li> <li>■ Information-sharing           <ul style="list-style-type: none"> <li>- I am regularly informed about the customer satisfaction level of our store</li> <li>- I am regularly informed about the sales volume of our store</li> <li>- I know the corporate goals of [employer]</li> </ul> </li> <li>■ Participation in decision-making           <ul style="list-style-type: none"> <li>- In our store, employees have sufficient discretion and competence to react to customer requests rapidly and flexibly</li> <li>- When store-level decisions are being made, the opinions and views of the employees are taken into account</li> <li>- In our store, suggestions for improvement are encouraged and rewarded</li> </ul> </li> <li>■ Employment security           <ul style="list-style-type: none"> <li>- My job at [employer] is safe in the future</li> </ul> </li> </ul> |
| <p><i>Job satisfaction</i></p> <ul style="list-style-type: none"> <li>■ In total, how satisfied are you with [employer] as an employee?</li> </ul>                                                                                                                                                                                                                                                                                                                                                                                                                                                                                                                                                                                                                                                                                                                                                                                                                                                                                                                                                                                                                                                                                          |
| <p><i>Customer satisfaction</i></p> <ul style="list-style-type: none"> <li>■ I am satisfied with the expert advice that I received</li> <li>■ Employees behave friendly towards me</li> <li>■ I can find a competent service employee quickly</li> </ul>                                                                                                                                                                                                                                                                                                                                                                                                                                                                                                                                                                                                                                                                                                                                                                                                                                                                                                                                                                                    |
| <p><i>Transformational leadership</i></p> <ul style="list-style-type: none"> <li>■ The store manager lives the firm's goals</li> <li>■ The store manager is a good example for how to show customer orientation</li> <li>■ The store manager appreciates my individual performance</li> </ul>                                                                                                                                                                                                                                                                                                                                                                                                                                                                                                                                                                                                                                                                                                                                                                                                                                                                                                                                               |

*Note.* Items were originally presented in German, and translated by the authors

## Online Supplement: Appendix B

## Model Fit Indices

|         | $\chi^2$ ( <i>df</i> ) | $\Delta \chi^2$ | CFI | TLI | SRMR | RMSEA |
|---------|------------------------|-----------------|-----|-----|------|-------|
| Model 1 | 1,610.76* (65)         | 911.04*         | .83 | .79 | .06  | .19   |
| Model 2 | 1,146.40* (63)         | 446.68*         | .88 | .85 | .05  | .16   |
| Model 3 | 699.72* (60)           |                 | .93 | .91 | .05  | .12   |

*Note.* Model 1: 1-factor model

Model 2: 3-factor model, with unit-level job satisfaction, transformational leadership, and HPWS, with all HRM practices items loading on one HPWS factor

Model 3: 3-factor model, with unit-level job satisfaction, transformational leadership, and HPWS, with HRM practices loading on four HPWS subscales, which comprise HPWS as a second-order construct

*df*: degrees of freedom;  $\Delta \chi^2$ : model comparisons with Model 3; CFI: comparative fit index; TLI: Tucker-Lewis index; SRMR: standardized root mean residual; RMSEA: root mean squared error of approximation

\*:  $p < .01$

## Online Supplement: Appendix C

## Correlations of HPWS Top/Bottom Quartile Dummy

---

|                                  | HPWS top/bottom<br>quartile dummy |
|----------------------------------|-----------------------------------|
| Transformational leadership      | -.05                              |
| HPWS                             | -.05                              |
| HPWS consensus                   | .09                               |
| Unit-level job satisfaction      | .01                               |
| Job satisfaction dispersion      | .06                               |
| Unit-level customer satisfaction | -.06                              |
| Expert status                    | .06                               |

---

*Note.* Correlations  $\geq .07$  are significant at  $p < .05$ , two-tailed tests
